# Supplementary material for: One-pot facile and mild construction of densely functionalized pyrimidines in water via consecutive C–C and C–S bonds formation
Source: Royal Society of Chemistry journal article supplement (doi:10.1039/c8ra04363a), 2018-01-01

## **Supporting Information**

### **One-pot facile and mild construction of densely functionalized pyrimidines in water via consecutive C-C and C-N bonds formation**

Pramod K. Sahu,<sup>\*a, b</sup> Praveen K. Sahu,<sup>b</sup> Manvendra S. Kaurav,<sup>a</sup> Mouslim Messali,<sup>c</sup> Saud M. Almutairi,<sup>d</sup> Puran L. Sahu,<sup>e</sup> Dau D. Agarwal<sup>a, b</sup>

<sup>a</sup>*School of Studies in Chemistry, Jiwaji University, Gwalior-474011, Madhya Pradesh, India*

<sup>b</sup>*Department of Industrial Chemistry, Jiwaji University, Gwalior-474011, Madhya Pradesh, India*

<sup>c</sup>*Department of Chemistry, Taibah University, 30002 Al-Madina Al-Mounawara, Saudi Arabia*

<sup>d</sup>*King Abdulaziz City for Science and Technology, Riyadh 11442, P.O.Box 6086, Saudi Arabia.*

<sup>e</sup>*Indian Pharmacopoeia Commission Ministry of Health and Family Welfare, Sector-23, Raj Nagar, Ghaziabad 201002, India*

\*To whom correspondence should be addressed: Email: [sahu.chemistry@gmail.com](mailto:sahu.chemistry@gmail.com), [researchdata6@gmail.com](mailto:researchdata6@gmail.com) (Pramod Kumar Sahu)

### **Table of Contents**

| <b>Contents</b>       | <b>Page No.</b> |
|-----------------------|-----------------|
| Methods and Material  | S2              |
| Characterization Data | S3-S6           |
| Scanned NMR Spectra   | S7-S21          |

## Materials and methods

### 2.1 Experimental

All reagents such as SLS, 4-hydroxy coumarin, aldehydes etc. were analytical grade.  $^1\text{H}$  and  $^{13}\text{C}$  NMR spectra were recorded on BRUKER AVANCE II 500 NMR spectrometer using  $\text{CDCl}_3$  and  $\text{DMSO-d}_6$  as solvent. Purity of the compound was checked by TLC. Melting points were determined in open capillary and are uncorrected.

#### One-pot three-component reaction

*Typical procedure.* A three neck round-bottomed flask was charged with aldehydes (2 mmol), 4-hydroxy coumarin (2 mmol), and urea/thiourea (2 mmol) in water (10 mL). Catalyst sodium lauryl sulphate (10 mol%) was charged in the reaction mixture. Reaction was conducted at RT for a desired period of time. Monitored the reaction mass by TLC analysis and confirmed by spectroscopic analysis.

## Characterization Data

### 4-Phenyl-3,4-dihydro-1*H*-chromeno[4,3-*d*]pyrimidine-2,5-dione (**4a**)

Off white powder, mp 160-162 °C; <sup>1</sup>H NMR (500 MHz, DMSO *d*<sub>6</sub>): δ<sub>H</sub> 6.36 (s, 1H, -CH), 7.09-7.39 (m, 9H, Ar-H), 7.60 (s, 1H, NH), 7.90 (s, 1H, NH); <sup>13</sup>C NMR (125 MHz, DMSO *d*<sub>6</sub>): 36 (C-1), 103 (C-2), 115 (C-13), 116 (C-17), 121 (C-14), 122 (C-15), 124 (C-16), 125 (C-6 and 10), 126 (C-8), 126 (C-7), 128 (C-9), 131 (C-5), 140 (C-12), 152 (C-3), 164 (C-4), 165 (C-11); ESI-MS: *m/z* Calculated for C<sub>17</sub>H<sub>12</sub>N<sub>2</sub>O<sub>3</sub> 292.29 Found [M]<sup>+</sup> 292.3; C, H and N analyses Calculated for C 69.86, H 4.14, N 9.58, Found C 70.02, H 4.18, N 9.69.

### 4-(2-Hydroxyphenyl)-3,4-dihydro-1*H*-chromeno[4,3-*d*]pyrimidine-2,5-dione (**4b**)

Off white powder, mp 240-242 °C; <sup>1</sup>H NMR (500 MHz, DMSO *d*<sub>6</sub>): δ<sub>H</sub> 6.25 (s, 1H, -CH), 6.49-6.56 (m, 2H, Ar-H), 6.79 (d, 2H, *J* = 8.0 Hz, Ar-H), 6.98 (t, 1H, *J* = 7.5 Hz, Ar-H), 7.28-7.34 (m, 2H, Ar-H), 7.56 (t, 1H, *J* = 7.0 Hz, Ar-H), 7.67 (s, 1H, -NH), 7.88 (s, 1H, -NH), 9.66 (s, 1H, OH); <sup>13</sup>C NMR (125 MHz, DMSO *d*<sub>6</sub>): 35 (C-1), 104 (C-2), 111 (C-13), 112 (C-17), 113 (C-14), 115 (C-15), 117 (C-16), 117 (C-7), 123 (C-8), 129 (C-9), 131 (C-10), 141 (C-5), 152 (C-6), 154 (C-12), 157 (C-3), 164 (C-4), 165 (C-11); ESI-MS: *m/z* Calculated for C<sub>17</sub>H<sub>12</sub>N<sub>2</sub>O<sub>4</sub> 308.29 Found [M]<sup>+</sup> 309; C, H and N analyses Calculated for C 66.23, H 3.92, N 9.09, Found C 66.32, H 3.99, N 9.15.

### 4-(4-Chlorophenyl)-3,4-dihydro-1*H*-chromeno[4,3-*d*]pyrimidine-2,5-dione (**4c**)

Off white powder, mp 195-197 °C; <sup>1</sup>H NMR (500 MHz, DMSO *d*<sub>6</sub>): δ<sub>H</sub> 6.28 (s, 1H, CH), 7.13 (d, 2H, *J* = 8.5 Hz, Ar-H), 7.54-7.34 (m, 6H, Ar-H), 7.56 (s, 1H, NH), 7.87 (s, 1H, -NH); <sup>13</sup>C NMR (125 MHz, DMSO *d*<sub>6</sub>): 35 (C-1), 104 (C-2), 116 (C-13), 118 (C-17), 123 (C-14), 128 (C-15), 128 (C-16), 129 (C-7), 130 (C-9), 131 (C-10), 132 (C-5), 137 (C-8), 139 (C-12), 152 (C-3),

164 (C-4), 165 (C-11); ESI-MS: m/z Calculated for C<sub>17</sub>H<sub>11</sub>ClN<sub>2</sub>O<sub>3</sub> 326.73 Found [M]<sup>+</sup> 326.7; C, H and N analyses Calculated for C 62.49, H 3.39, N 8.57, Found C 62.32, H 3.49, N 8.65.

4-(4-Dimethylamino phenyl)-3,4-dihydro-1*H*-chromeno[4,3-*d*]pyrimidine-2,5-dione (**4d**)

Off white powder, mp 235-237 °C; <sup>1</sup>H NMR (500 MHz, DMSO d<sub>6</sub>): δ<sub>H</sub> 3.11 (s, 6H, N(CH<sub>3</sub>)<sub>2</sub>), 6.27 (s, 1H, -CH), 7.21-7.28 (m, 8H, Ar-H), 7.51 (s 1H, -NH), 7.79 (s, 1H, -NH); <sup>13</sup>C NMR (125 MHz, DMSO d<sub>6</sub>): 35 (C-1), 45 (N(CH<sub>3</sub>)<sub>2</sub>), 103 (C-2), 111 (C-13), 115 (C-17), 119 (C-14), 122 (C-15 and 16), 124 (C-8 and 5), 128 (C-7 and 9), 131 (C-6 and 10), 131 (C-12), 152 (C-3), 164 (C-4), 167 (C-11); ESI-MS: m/z Calculated for C<sub>19</sub>H<sub>17</sub>N<sub>3</sub>O<sub>3</sub> 335.36 Found [M]<sup>+</sup> 336; C, H and N analyses Calculated for C 68.05, H 5.11, N 12.53, Found C 68.12, H 5.22, N 12.61.

4-(3-Nitrophenyl)-3,4-dihydro-1*H*-chromeno[4,3-*d*]pyrimidine-2,5-dione (**4e**)

Off white powder, mp 172-174 °C; <sup>1</sup>H NMR (500 MHz, DMSO d<sub>6</sub>): δ<sub>H</sub> 6.37 (s, 1H,-CH), 7.27-7.33 (m, 4H, Ar-H), 7.38 (d, 2H, J = 8.5 Hz, Ar-H), 7.56 (t, 2H, J = 8.0 Hz, Ar-H), 7.84 (s, 1H, -NH), 8.09 (s, 1H, -NH); <sup>13</sup>C NMR (125 MHz, DMSO d<sub>6</sub>): 36 (C-1), 103 (C-2), 115 (C-13), 118 (C-17), 123 (C-14), 123 (C-15), 124 (C-16), 124 (C-5), 128 (C-6), 130 (C-10), 131 (C-7 and 9), 145 (C-8), 150 (C-12), 152 (C-3), 164 (C-4), 166 (C-11); ESI-MS: m/z Calculated for C<sub>17</sub>H<sub>11</sub>N<sub>3</sub>O<sub>5</sub> 337.29 Found [M]<sup>+</sup> 337.3; C, H and N analyses Calculated for C 60.54, H 3.29, N 12.46, Found C 60.70, H 3.41, N 12.29.

4-(4-Hydroxy-3-methoxyphenyl)-3,4-dihydro-1*H*-chromeno[4,3-*d*]pyrimidine-2,5-dione (**4f**)

Off white powder, mp 208-210 °C; <sup>1</sup>H NMR (500 MHz, DMSO d<sub>6</sub>): δ<sub>H</sub> 3.72 (s, 3H, OCH<sub>3</sub>), 6.39 (s, 1H, -CH), 7.16-7.39 (m, 7H, Ar-H), 7.60 (s, 1H, -NH), 7.93 (s, 1H, -NH), 10.20 (br, 1H, OH); <sup>13</sup>C NMR (125 MHz, DMSO d<sub>6</sub>): 35 (C-1), 56 (OCH<sub>3</sub>), 104 (C-2), 116 (C-13), 117 (C-17), 123

(C-14), 123 (C-15), 124 (C-16), 125 (C-8), 126 (C-9), 128 (C-7), 129 (C-10), 130 (C-6), 132 (C-5), 139 (C-12), 152 (C-3), 164 (C-4), 166 (C-11); ESI-MS:  $m/z$  Calculated for  $C_{18}H_{14}N_2O_5$  338.31 Found  $[M]^+$  338.3; C, H and N analyses Calculated for C 63.90, H 4.17, N 8.28, Found C 63.76, H 4.31, N 8.11.

4-Phenyl-2-thioxo-3,4-dihydro-1*H*-chromeno[4,3-*d*]pyrimidin-5-one (**4h**)

Off white powder, mp 185-187 °C;  $^1H$  NMR (500 MHz, DMSO  $d_6$ ):  $\delta_H$  6.34 (s, 1H, -CH), 7.24-7.39 (m, 9H, Ar-H), 7.82 (s, 1H, -NH), 8.09 (s, 1H, -NH);  $^{13}C$  NMR (125 MHz, DMSO  $d_6$ ): 36 (C-1), 103 (C-2), 115 (C-13), 119 (C-17), 123 (C-14), 123 (C-15), 124 (C-16), 127 (C-5), 131 (C-6 and 10), 132 (C-7 and 9), 145 (C-8), 150 (C-12), 152 (C-3), 164 (C-4), 166 (C-11); ESI-MS:  $m/z$  Calculated for  $C_{17}H_{12}N_2O_2S$  308.35 Found  $[M]^+$  308.3; C, H and N analyses Calculated for C 66.22, H 3.92, N 9.08, Found C 66.46, H 4.01, N 9.18.

4-(2-Hydroxyphenyl)-2-thioxo-3,4-dihydro-1*H*-chromeno[4,3-*d*]pyrimidin-5-one (**4i**)

Off white powder, mp 170-172 °C;  $^1H$  NMR (500 MHz, DMSO  $d_6$ ):  $\delta_H$  5.38 (s, 1H, -CH), 7.05-7.69 (m, 8H, Ar-H), 8.02 (s, 1H, -NH), 8.15 (s, 1H, -NH), 11.74 (s, 1H, OH);  $^{13}C$  NMR (125 MHz, DMSO  $d_6$ ): 35 (C-1), 102 (C-2), 109 (C-13), 110 (C-17), 111 (C-14), 113 (C-15), 115 (C-16), 115 (C-5), 121 (C-6), 127 (C-10), 129 (C-7), 139 (C-9), 150 (C-8), 152 (C-12), 155 (C-3), 162 (C-4), 163 (C-11); ESI-MS:  $m/z$  Calculated for  $C_{17}H_{12}N_2O_3S$  324.35 Found  $[M]^+$  324.4; C, H and N analyses Calculated for C 62.95, H 3.73, N 8.64, Found C 62.88, H 3.81, N 8.72.

4-(4-Chlorophenyl)-2-thioxo-3,4-dihydro-1*H*-chromeno[4,3-*d*]pyrimidin-5-one (**4j**)

Off white powder, mp 187-189 °C;  $^1H$  NMR (500 MHz, DMSO  $d_6$ ):  $\delta_H$  6.29 (s, 1H, -CH), 7.14 (d, 1H,  $J = 7.5$  Hz, Ar-H), 7.24-7.35 (m, 5H, Ar-H), 7.55-7.59 (m, 2H, Ar-H), 7.88 (s, 1H, -NH), 7.93 (s, 1H, -NH);  $^{13}C$  NMR (125 MHz, DMSO  $d_6$ ): 35 (C-1), 104 (C-2), 116 (C-13), 117 (C-

17), 123 (C-14), 128 (C-15), 129 (C-16), 130 (C-5), 131 (C-6 and 10), 132 (C-7 and 9), 137 (C-8), 138 (C-12), 152 (C-3), 164 (C-4), 166 (C-11); ESI-MS:  $m/z$  Calculated for  $C_{17}H_{11}ClN_2O_2S$  342.80 Found  $[M]^+$  343; C, H and N analyses Calculated for C 59.56, H 3.23, N 8.17, Found C 60.78, H 3.31, N 8.22.

4-(4-Dimethylaminophenyl)-2-thioxo-3,4-dihydro-1*H*-chromeno[4,3-*d*]pyrimidin-5-one (**4k**)

Off white powder, mp 238-240 °C;  $^1H$  NMR (500 MHz, DMSO  $d_6$ ):  $\delta_H$  3.11 (s, 6H, N(CH<sub>3</sub>)<sub>2</sub>), 6.26 (s, 1H, -CH), 7.17-7.28 (m, 4H, Ar-H), 7.49-7.56 (m, 4H, Ar-H), 7.69 (s, 1H, NH), 7.80 (s, 1H, NH);  $^{13}C$  NMR (125 MHz, DMSO  $d_6$ ): 36 (C-1), 45 (N(CH<sub>3</sub>)<sub>2</sub>), 103 (C-2), 111 (C-13), 115 (C-17), 119 (C-14), 123 (C-15), 123 (C-16), 124 (C-7 and 9), 124 (C-6 and 10), 128 (C-5 and 8), 131 (C-12), 153 (C-3), 164 (C-4), 167 (C-11); ESI-MS:  $m/z$  Calculated for  $C_{19}H_{17}N_3O_2S$  351.42 Found  $[M]^+$  351.2; C, H and N analyses Calculated for C 64.94, H 4.88, N 11.96, Found C 64.78, H 4.01, N 12.10.

## Scanned NMR Spectra

### Compound 4a

#### <sup>1</sup>H NMR

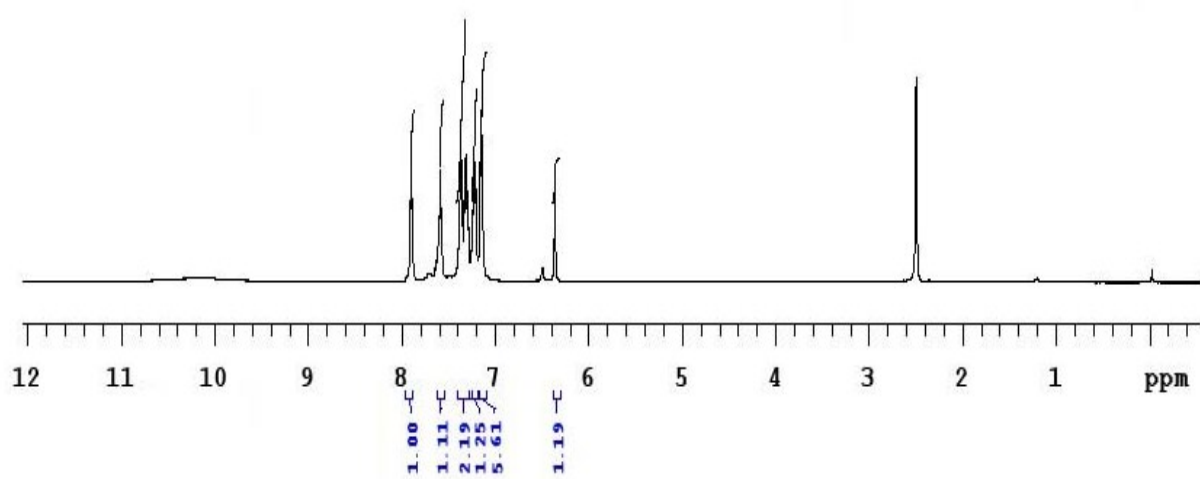

#### <sup>13</sup>C NMR

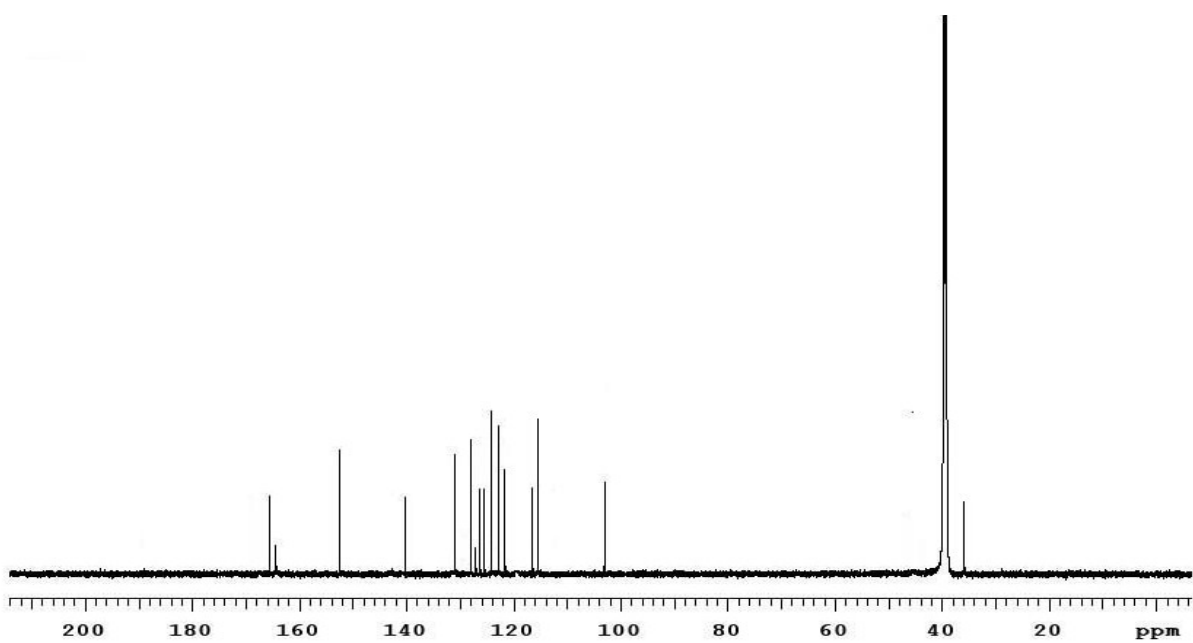

## Mass

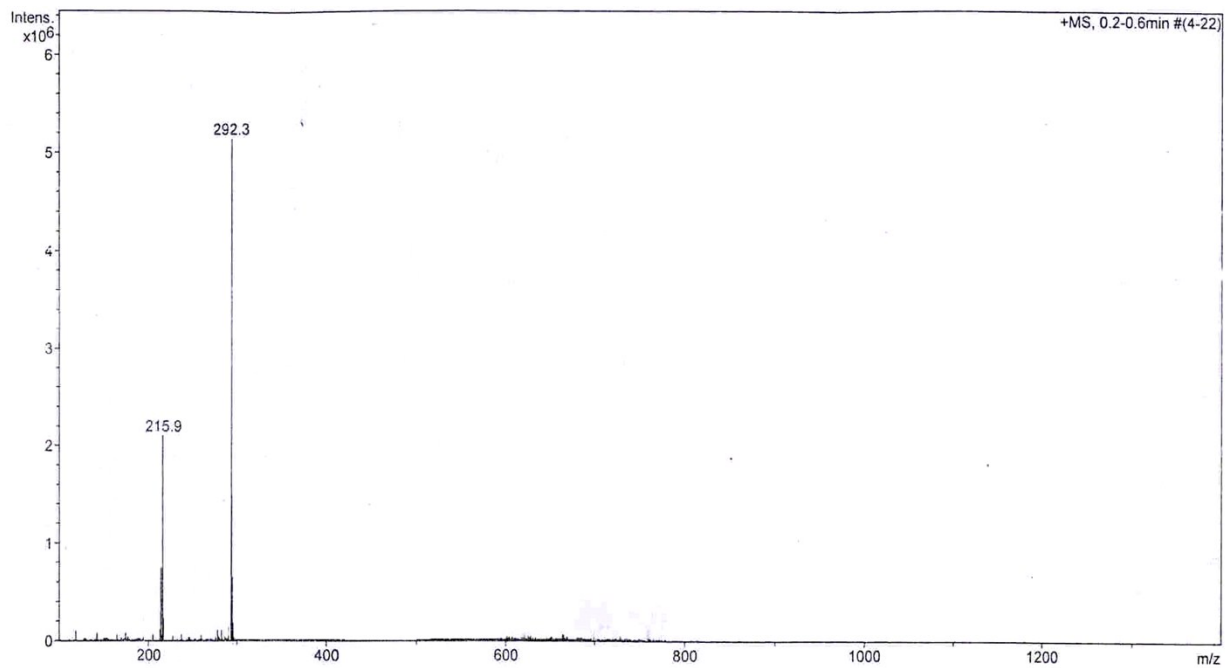

## Compound 4b

### <sup>1</sup>H NMR

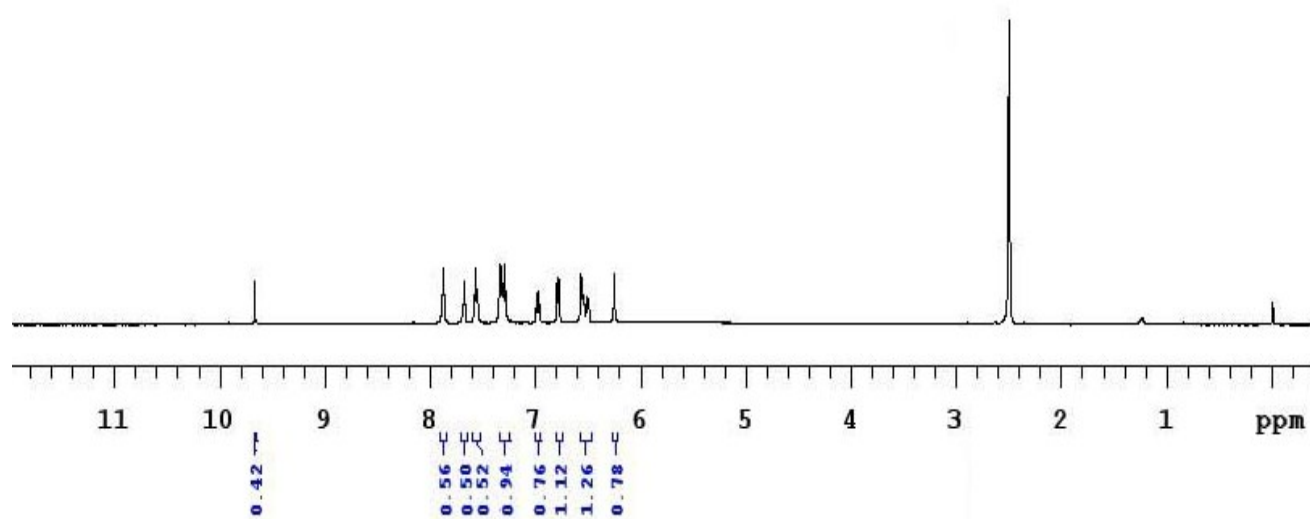



# <sup>13</sup>C NMR

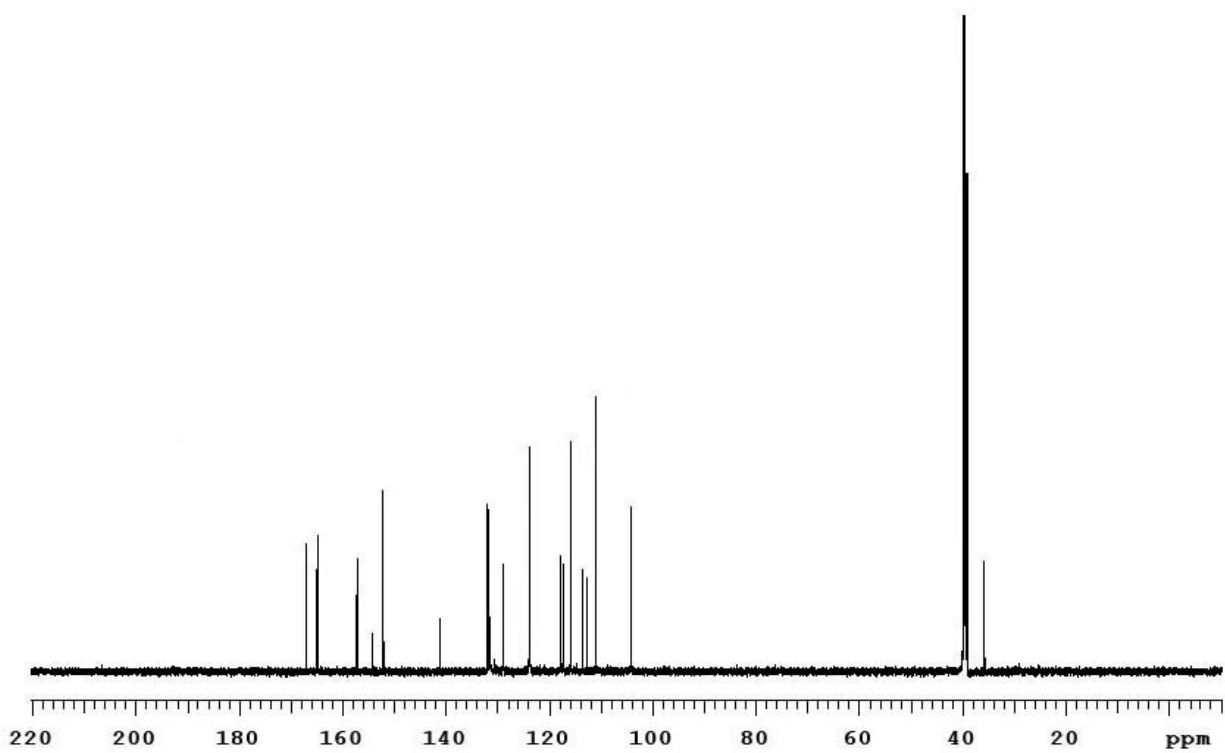

# Mass

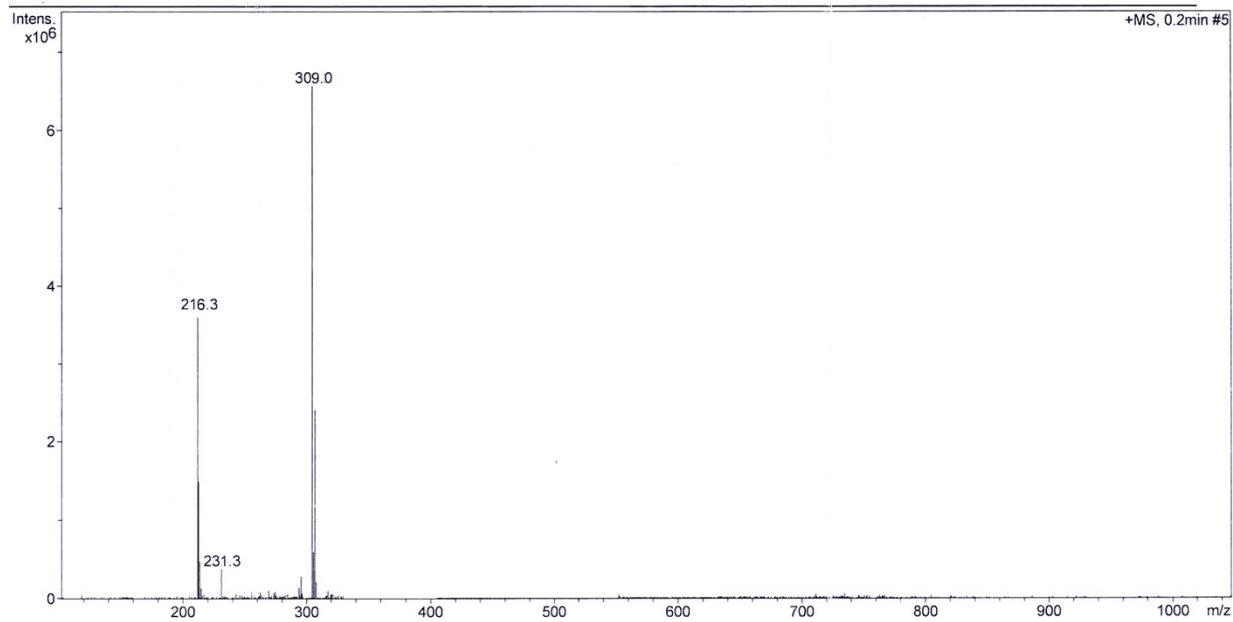

# Compound 4c

## <sup>1</sup>H NMR

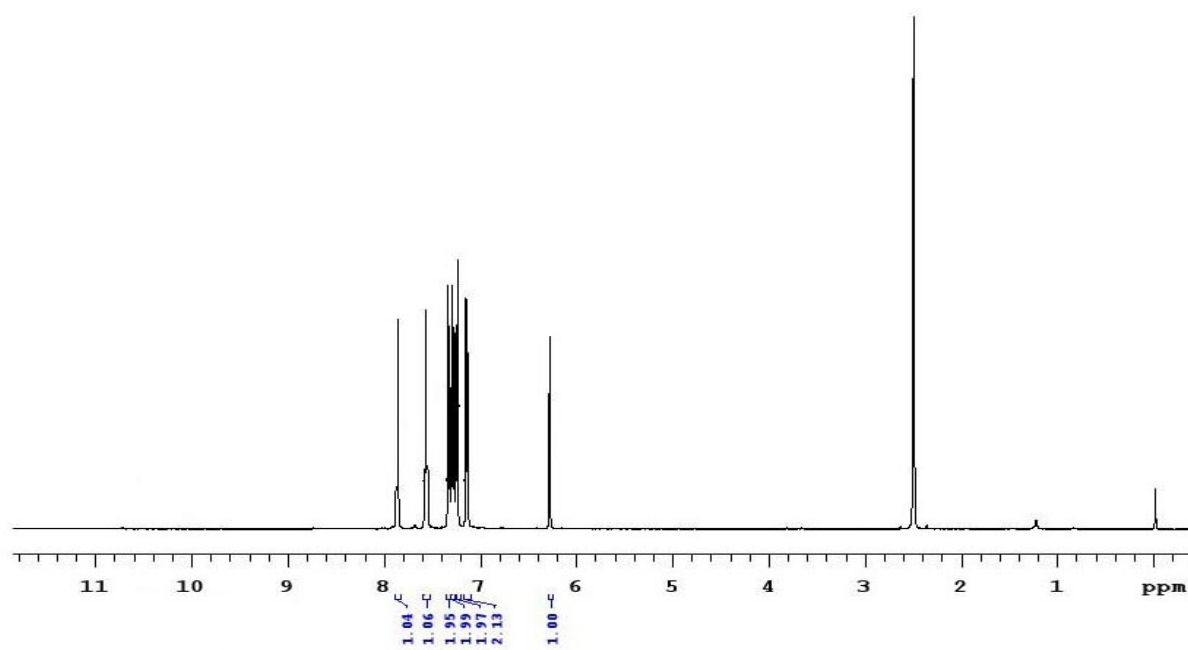

## <sup>13</sup>C NMR

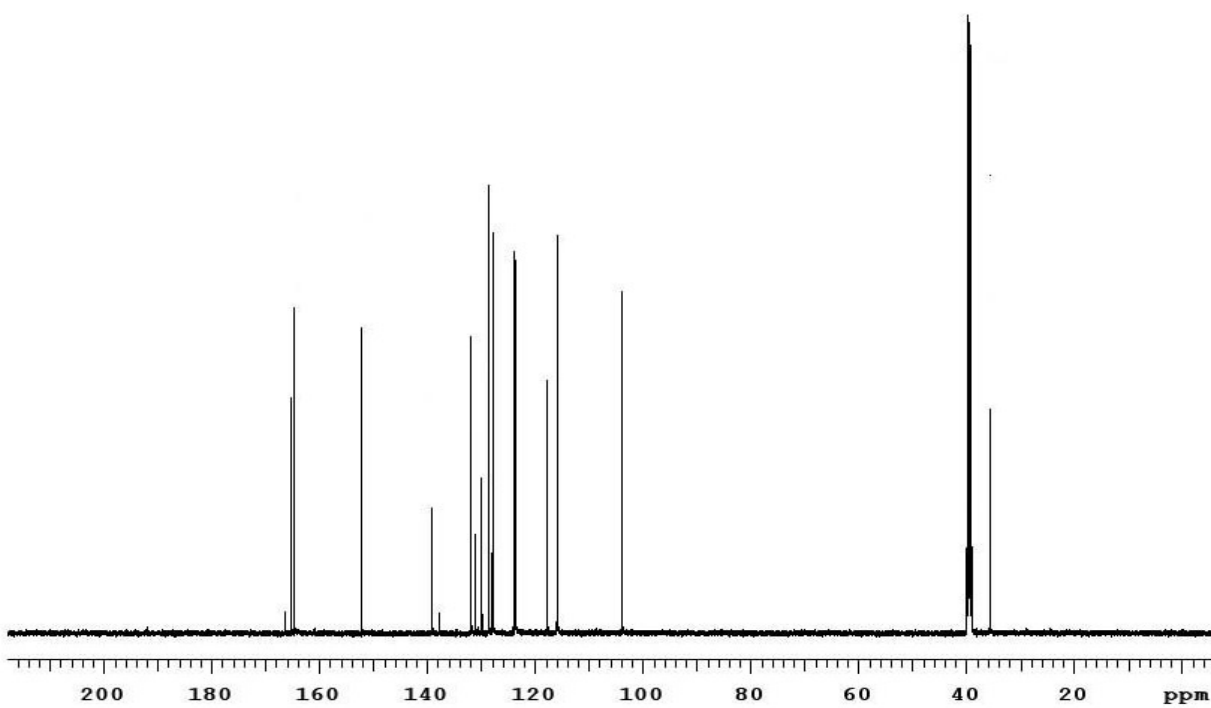

## Mass

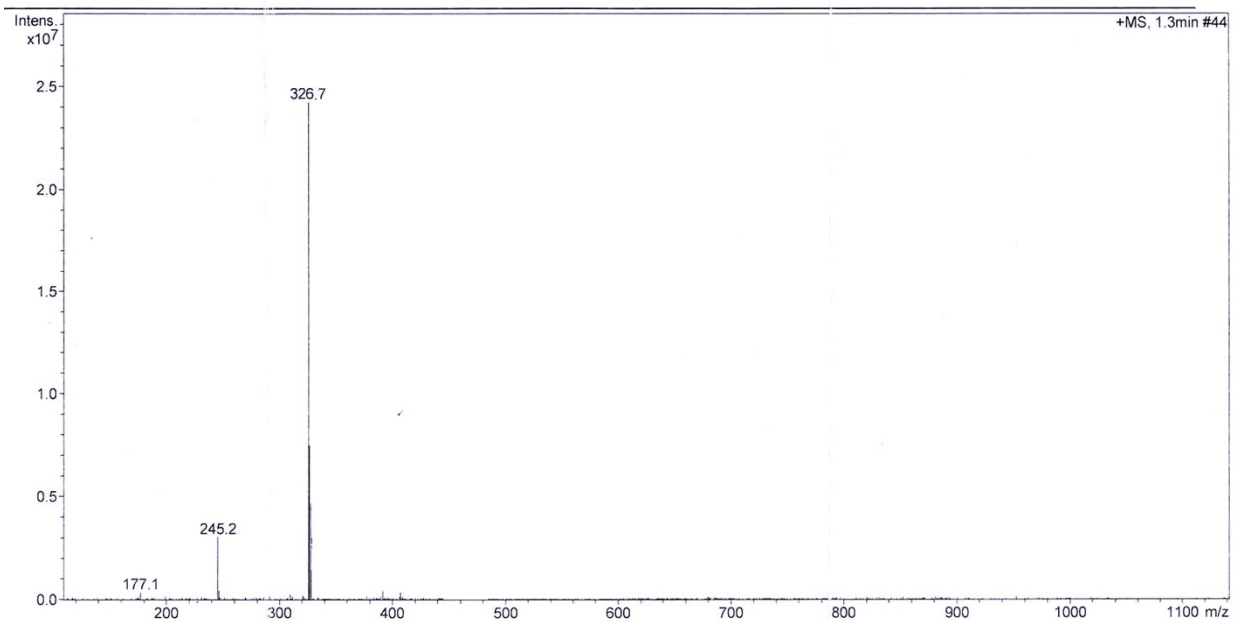

## Compound 4d

### <sup>1</sup>H NMR

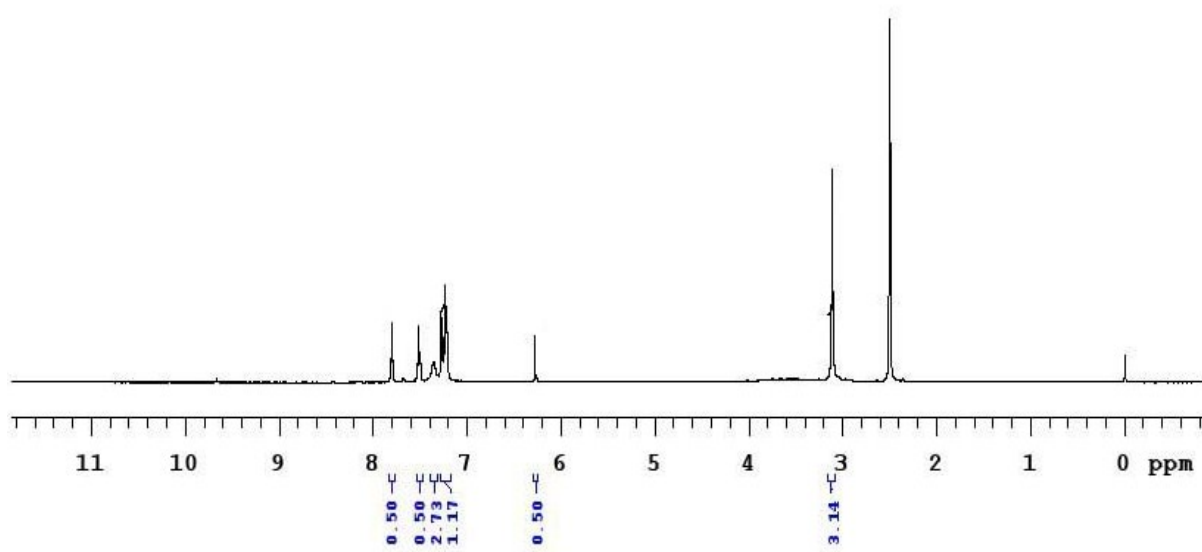

### <sup>13</sup>C NMR

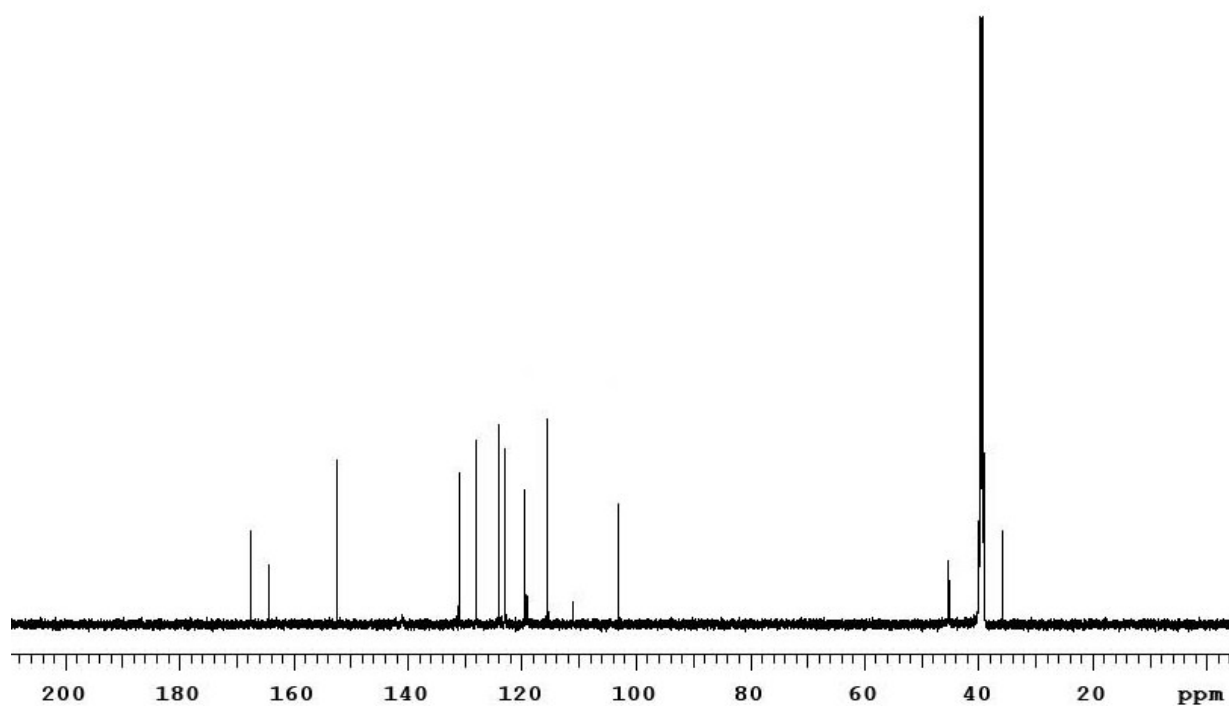

### Mass

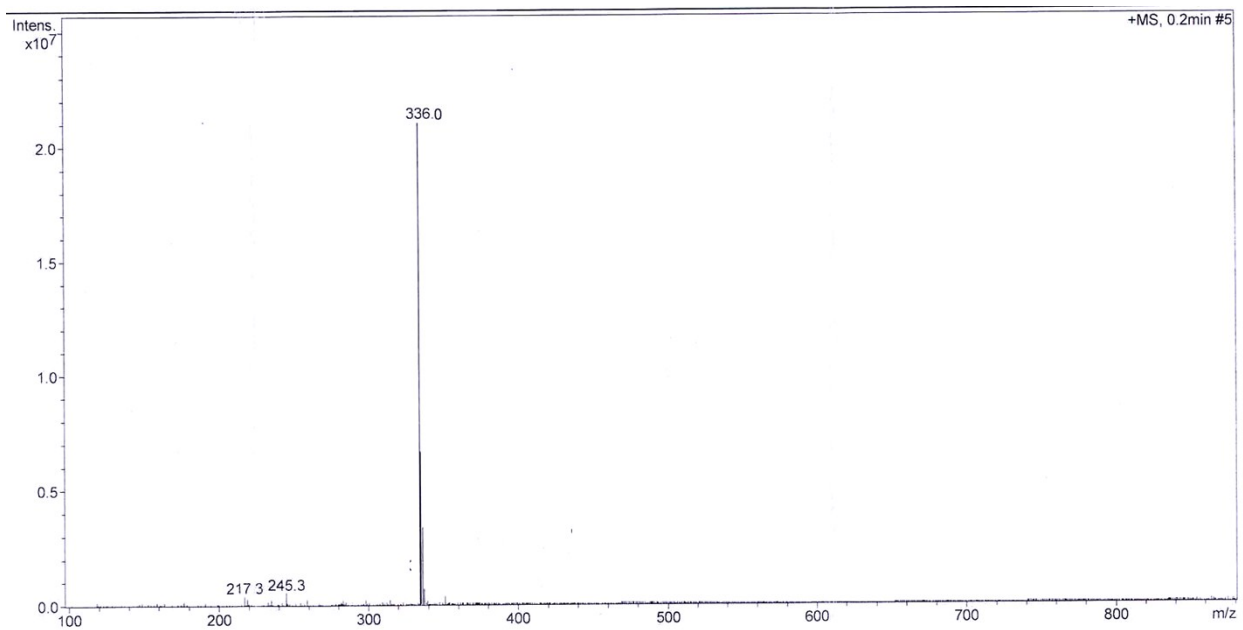

# Compound 4e

## <sup>1</sup>H NMR

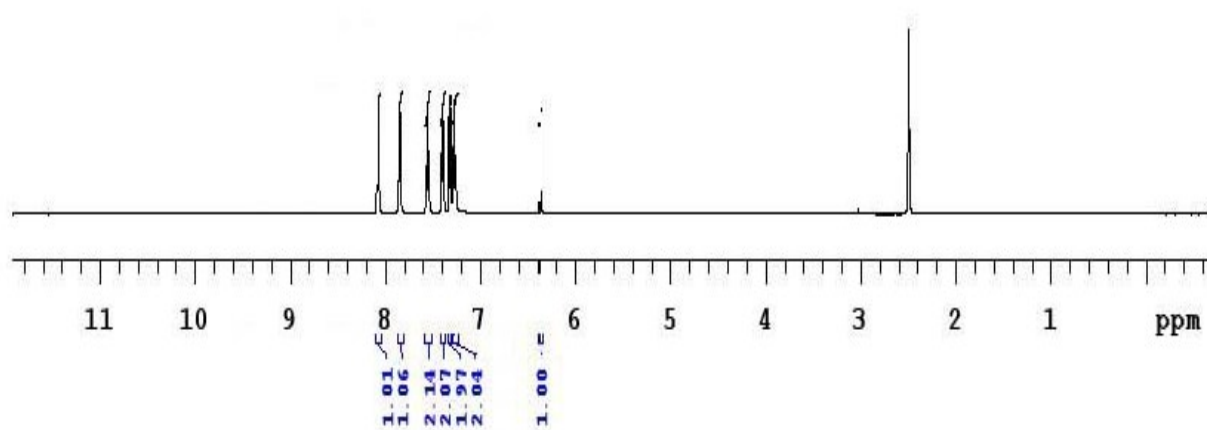

## <sup>13</sup>C NMR

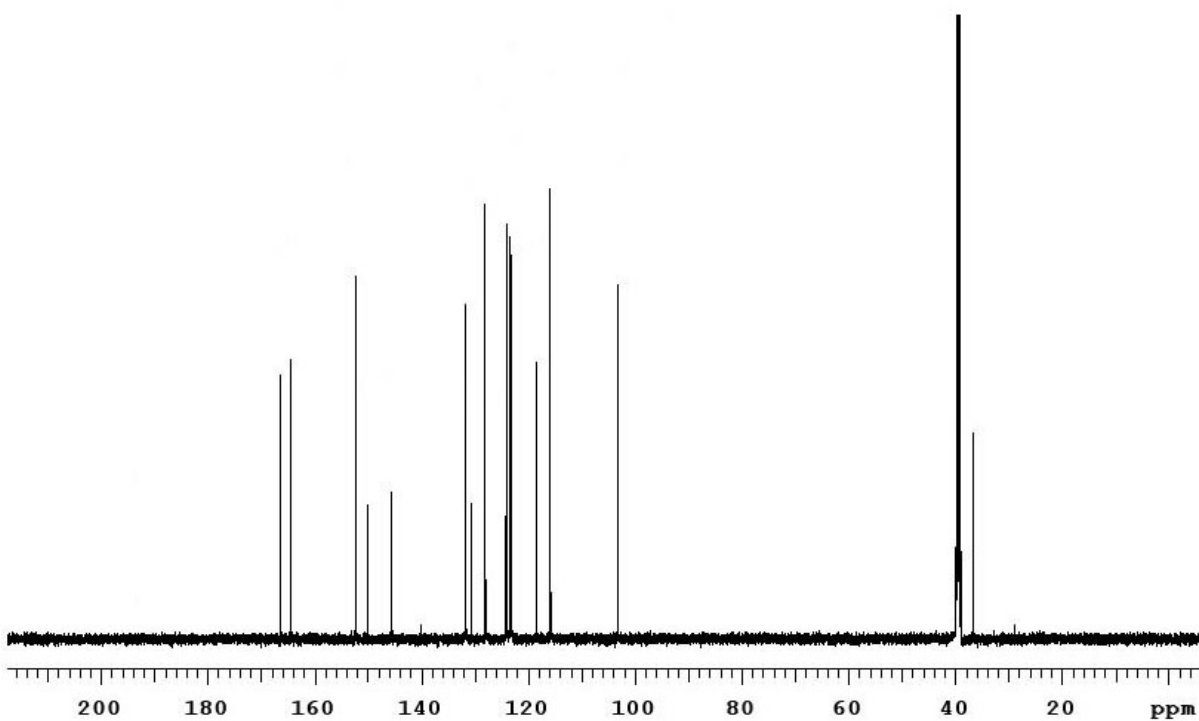

## Mass

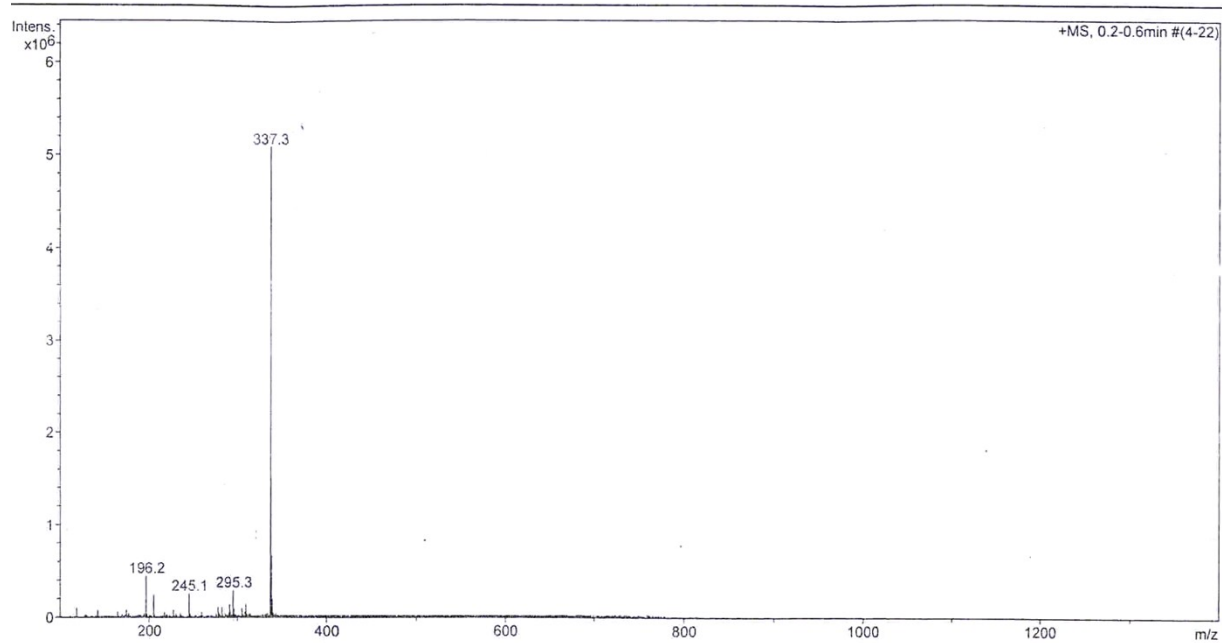

## Compound 4f

### <sup>1</sup>H NMR

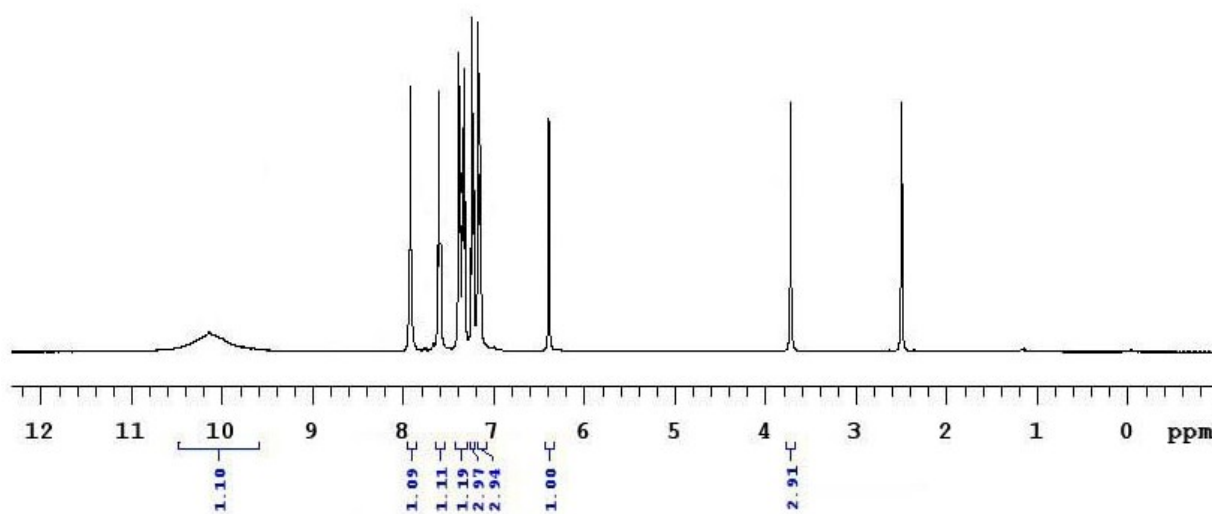

# <sup>13</sup>C NMR

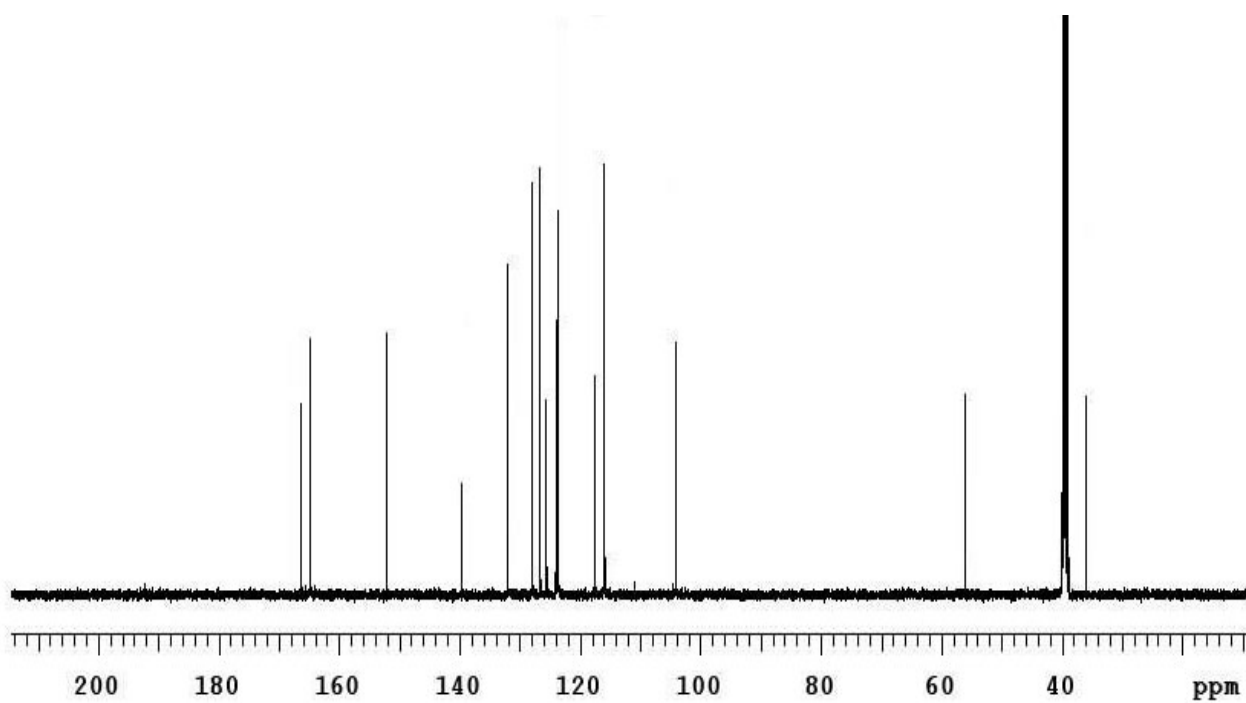

# Mass

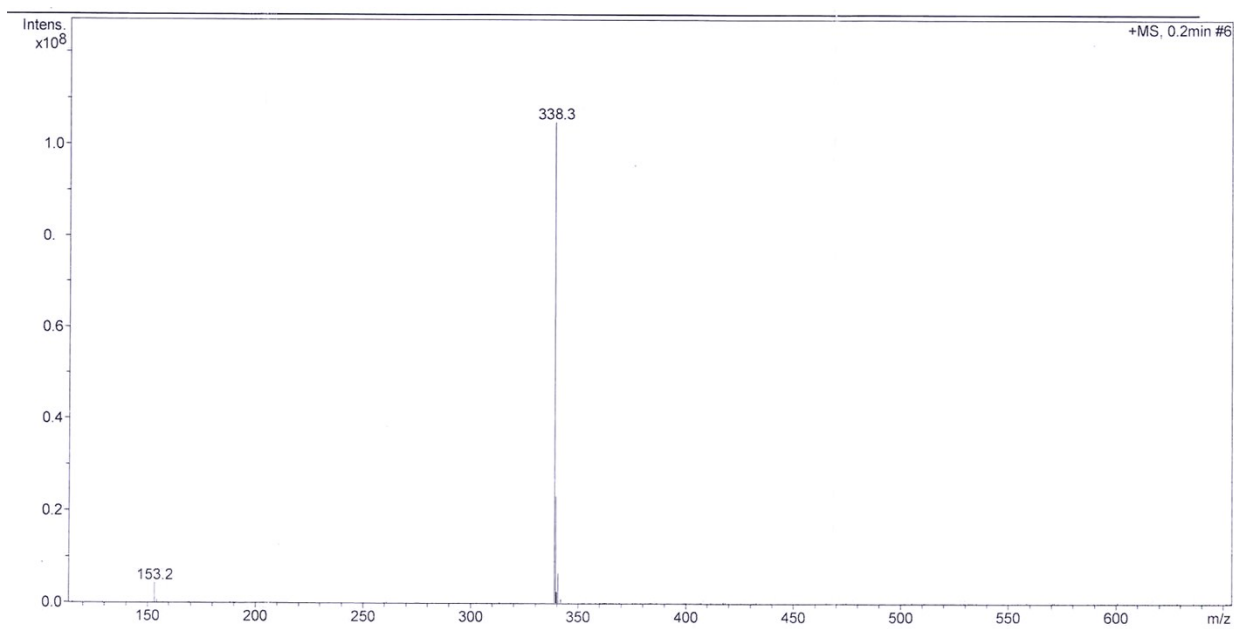

# Compound 4h

## <sup>1</sup>H NMR

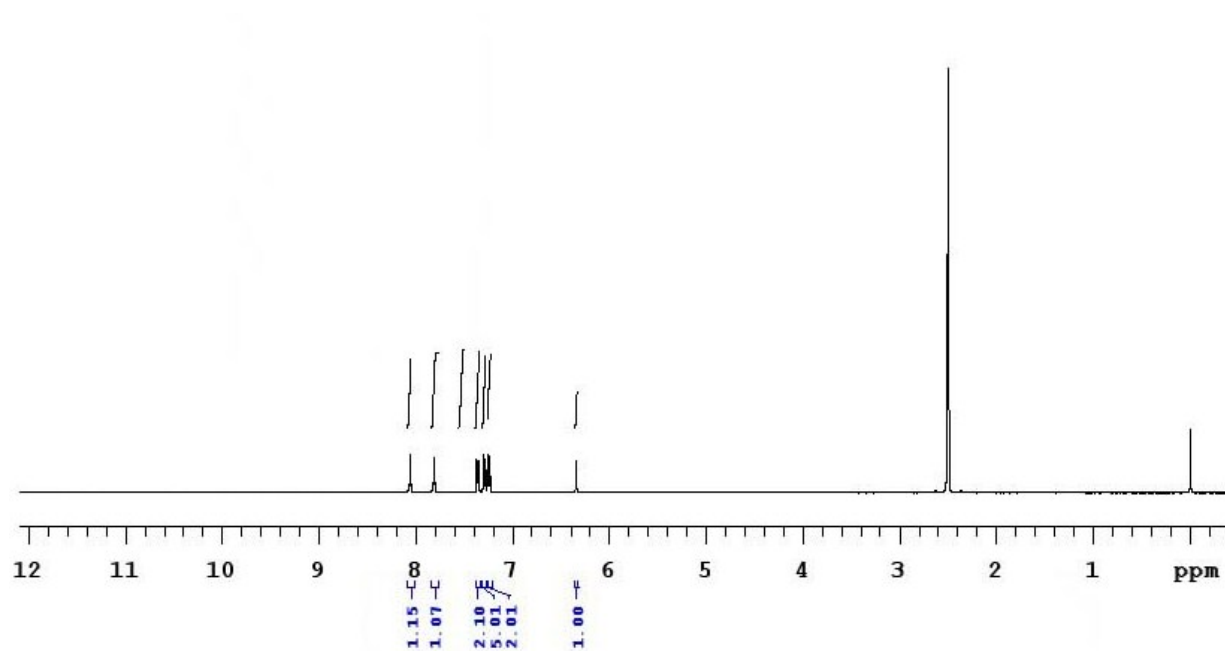

## <sup>13</sup>C NMR

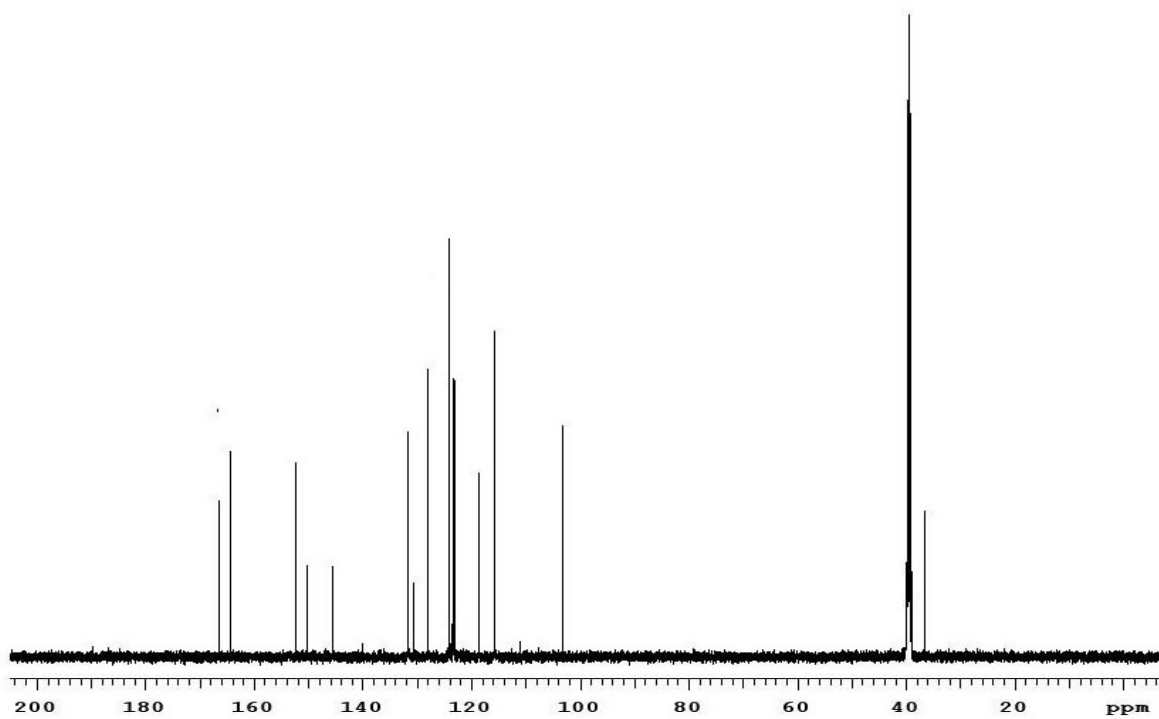



## Mass

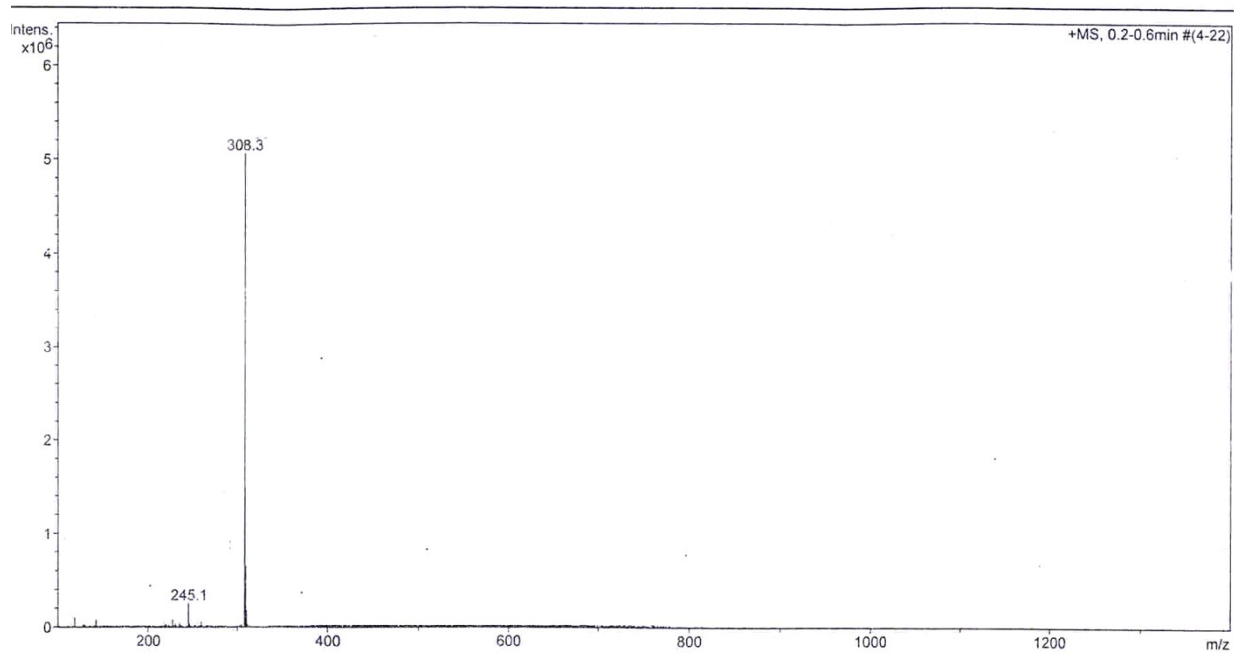

## Compound 4i

## <sup>1</sup>H NMR

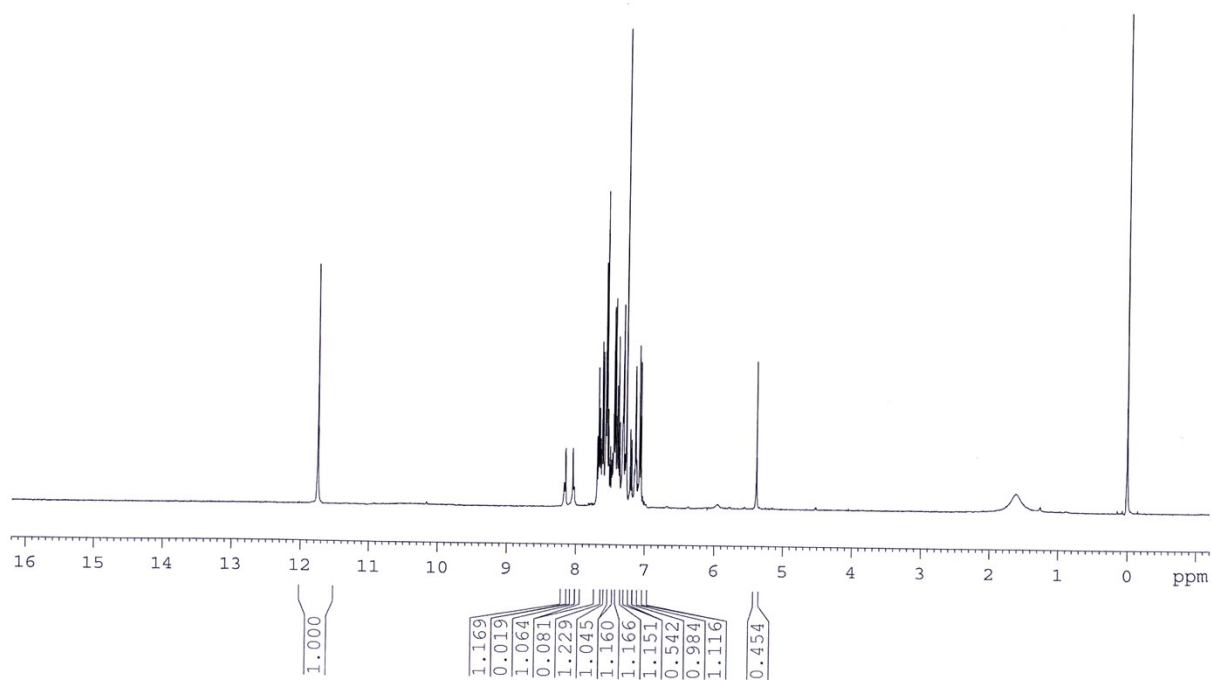

# <sup>13</sup>C NMR

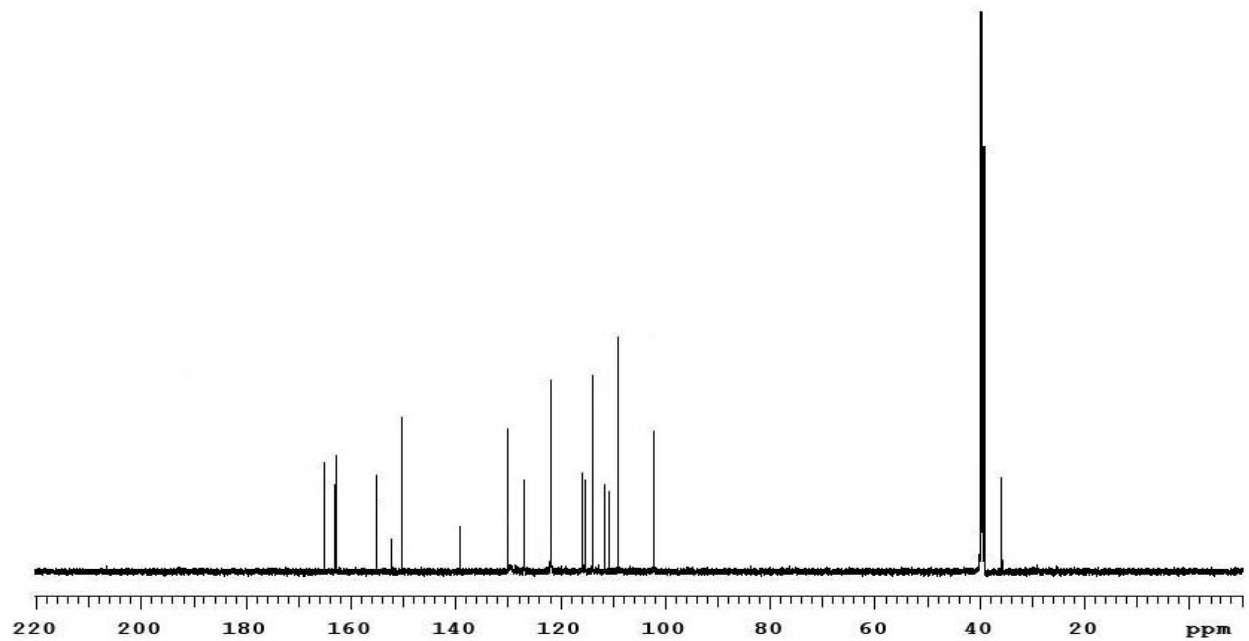

# Mass

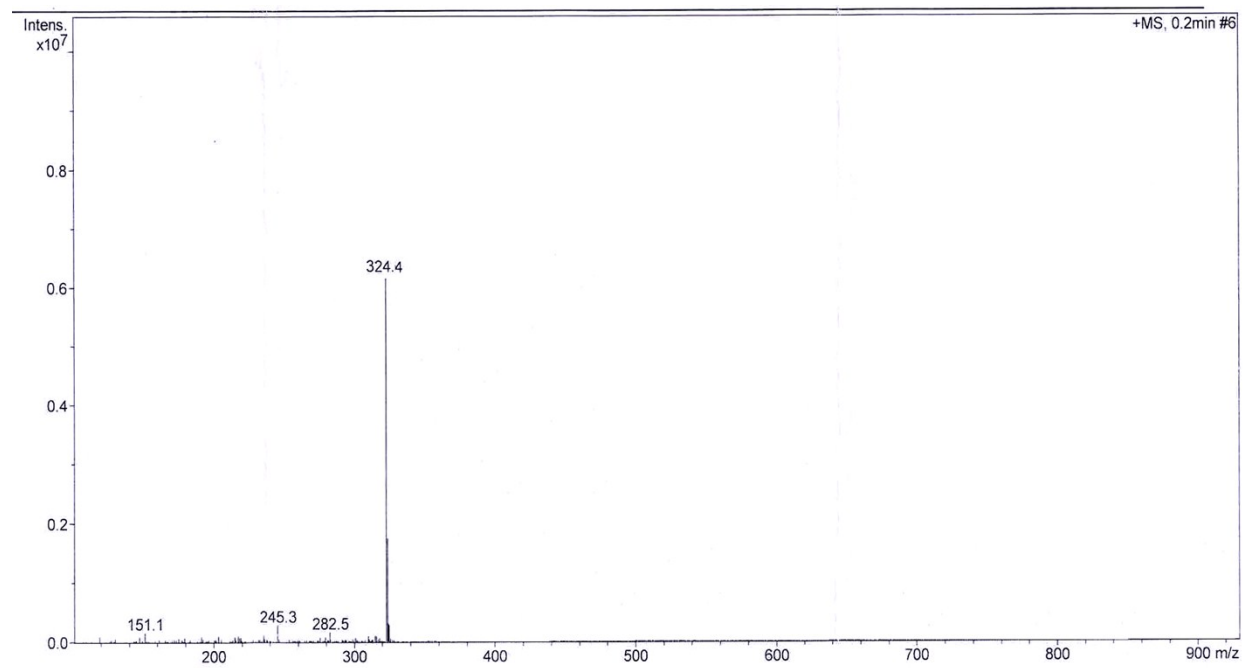

# Compound 4j

## <sup>1</sup>H NMR

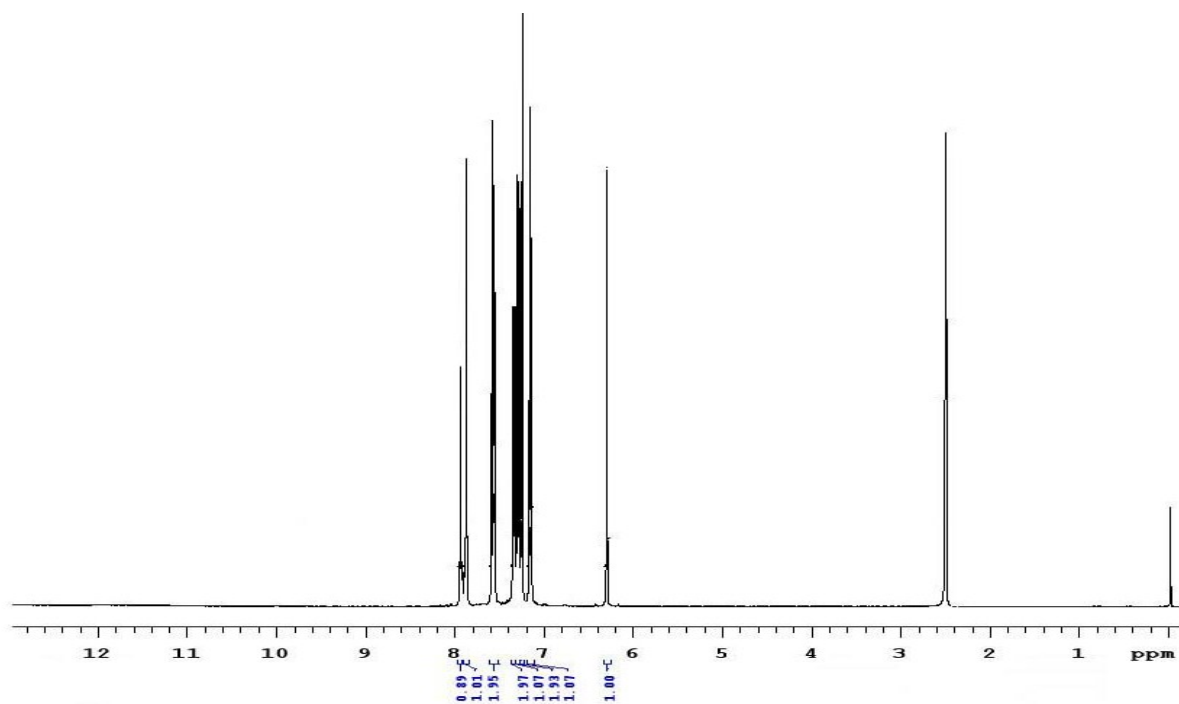

## <sup>13</sup>C NMR

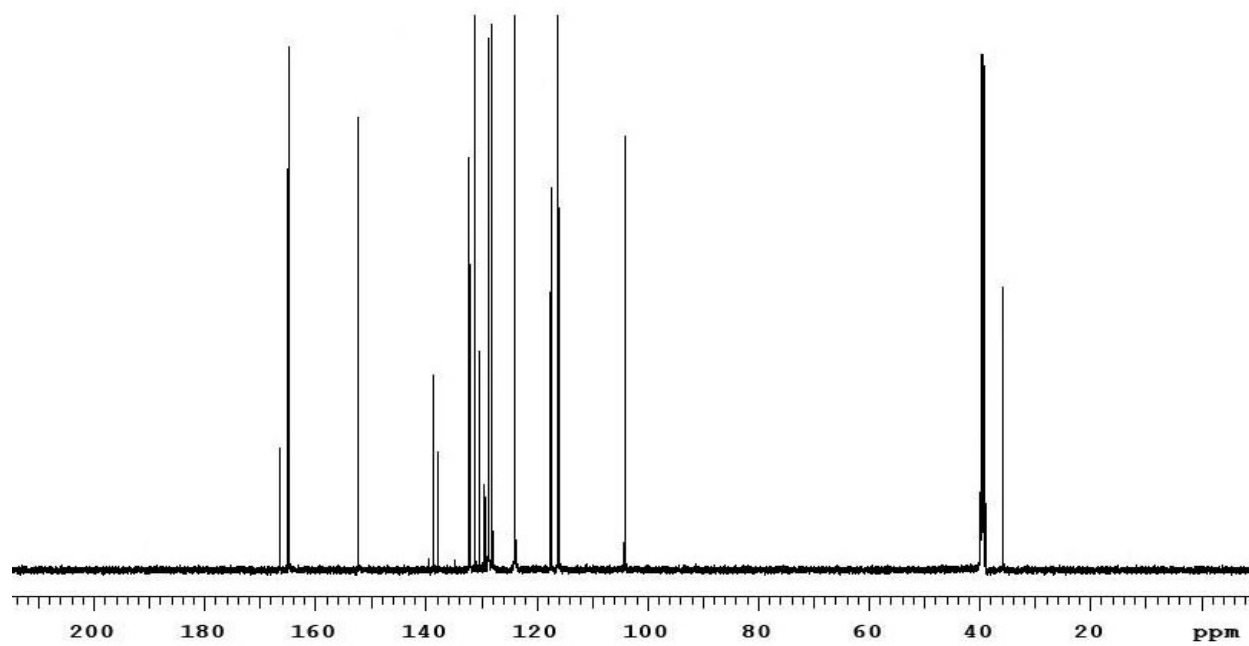

## Mass

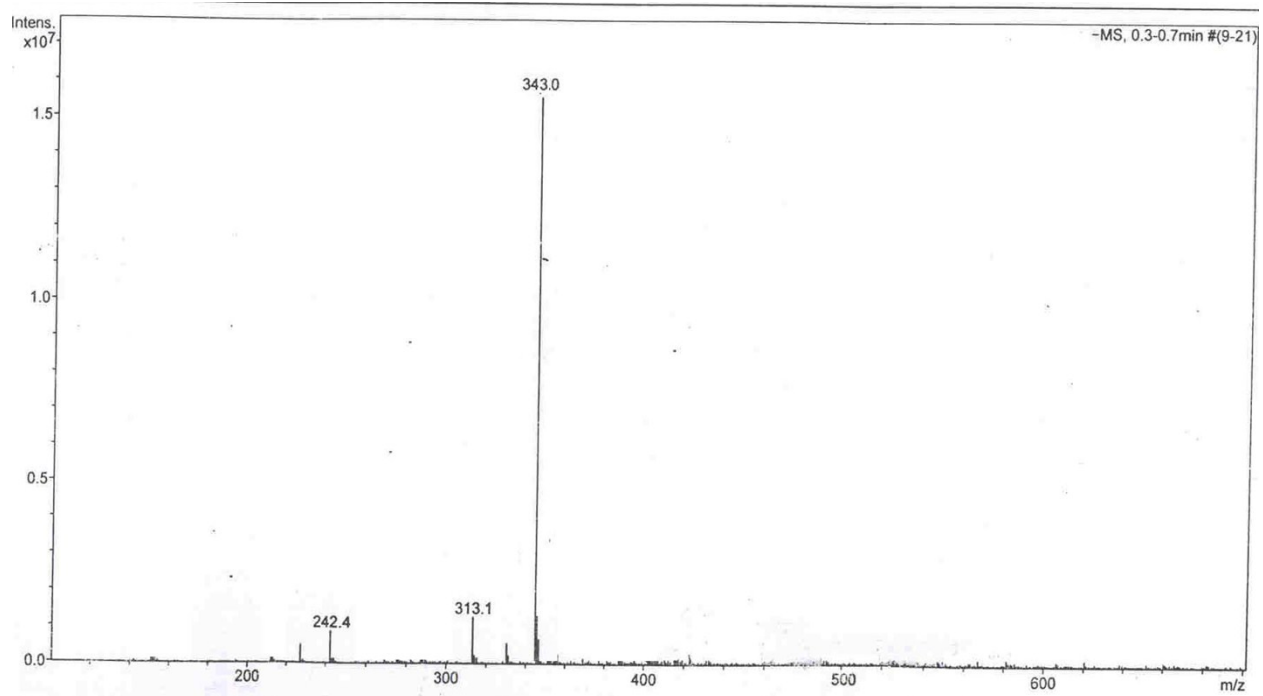

## Compound 4k

### <sup>1</sup>H NMR

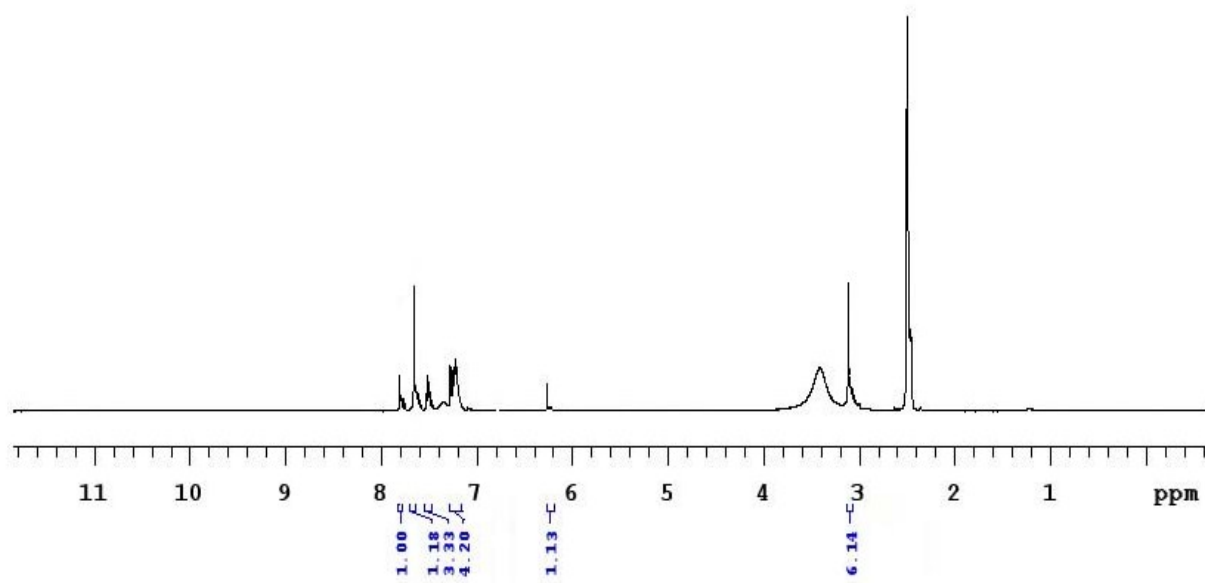

# <sup>13</sup>C NMR

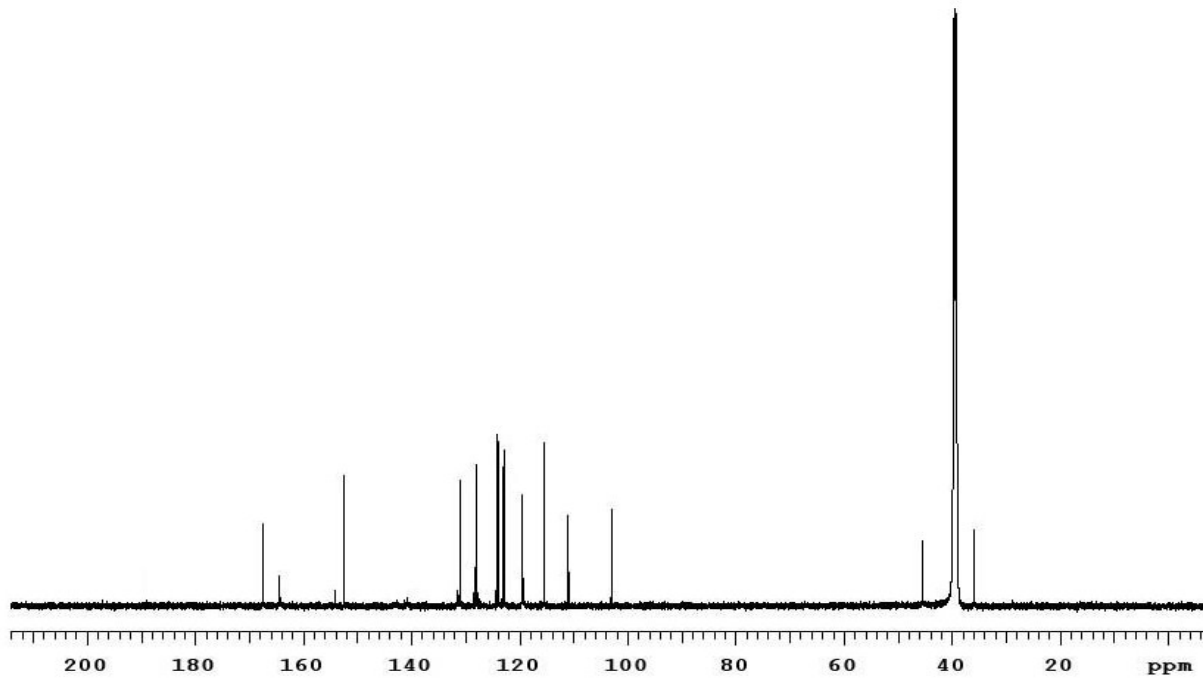

# Mass

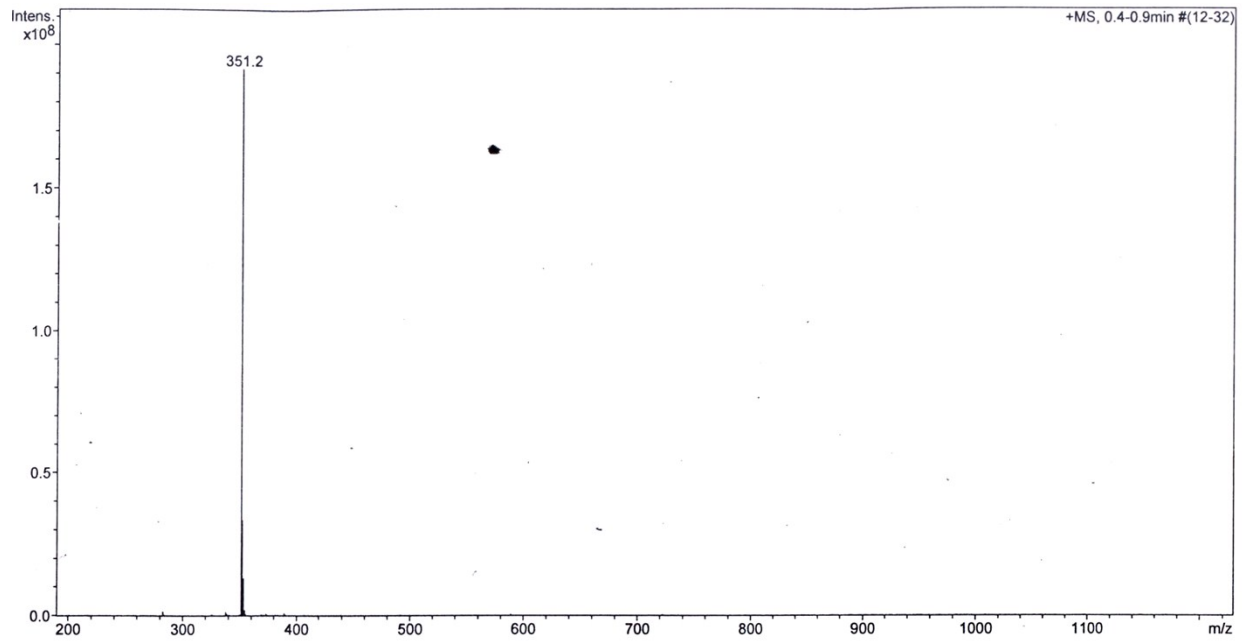

Supplement: c8ra04363a1.pdf [file c8ra04363a1.pdf]
